# Supplementary material for: Effectiveness of malaria control interventions in Madagascar: a nationwide case–control survey
Source: Springer Nature journal article supplement (doi:10.1186/s12936-016-1132-x), 2016-02-11
Supplement: MOESM1 [file 9762130]

### Effectiveness of LLIN in all areas with LLIN distribution

| Variable                       | Category    | N cases (%) | N controls (%) | Bivariate          |        | Multivariate        |        |
|--------------------------------|-------------|-------------|----------------|--------------------|--------|---------------------|--------|
|                                |             |             |                | Crude OR [95% CI]  | p      | Adj. OR [95% CI]    | p      |
| <b>Every night bed net use</b> | LLIN        | 328 (39.3)  | 4052 (53.2)    | 0.47 [0.27 - 0.80] | 0.006  | 0.50 [0.30 - 0.84]  | 0.009  |
|                                | NIBN        | 84 (10.1)   | 874 (11.5)     | 0.62 [0.40 - 0.96] | 0.032  | 0.63 [0.43 - 0.94]  | 0.023  |
|                                | None        | 422 (50.6)  | 2691 (35.3)    | 1.00               |        | 1.00                |        |
| <b>Age group</b>               | 0-1 year    | 56 ( 6.7)   | 334 ( 4.4)     | 3.42 [1.53 - 7.62] | 0.003  | 3.26 [1.45 - 7.36]  | 0.004  |
|                                | 2-4 years   | 114 (13.7)  | 841 (11.0)     | 2.96 [1.66 - 5.25] | <0.001 | 2.72 [1.51 - 4.88]  | <0.001 |
|                                | 5-9 years   | 176 (21.1)  | 1323 (17.4)    | 2.72 [1.79 - 4.16] | <0.001 | 2.45 [1.64 - 3.65]  | <0.001 |
|                                | 10-15 years | 172 (20.6)  | 1114 (14.6)    | 3.05 [2.16 - 4.31] | <0.001 | 2.62 [1.88 - 3.65]  | <0.001 |
|                                | 15-19 years | 124 (14.9)  | 787 (10.3)     | 3.11 [1.96 - 4.94] | <0.001 | 2.56 [1.69 - 3.86]  | <0.001 |
|                                | 20-39 years | 138 (16.5)  | 1872 (24.6)    | 1.70 [0.98 - 2.95] | 0.061  | 1.59 [0.94 - 2.67]  | 0.083  |
|                                | ≥40 years   | 54 ( 6.5)   | 1346 (17.7)    | 1.00               |        | 1.00                |        |
| <b>Sex</b>                     | Male        | 453 (54.3)  | 3283 (43.1)    | 1.00               |        | 1.00                |        |
|                                | Female      | 381 (45.7)  | 4334 (56.9)    | 0.64 [0.53 - 0.77] | <0.001 | 0.73 [0.61 - 0.86]  | <0.001 |
| <b>Transmission patterns</b>   | East        | 252 (30.2)  | 2194 (28.8)    | 1.10 [0.16 - 7.55] | 0.923  | 1.90 [0.24 - 15.01] | 0.541  |
|                                | Fringe      | 58 ( 7.0)   | 670 ( 8.8)     | 1.00               |        | 1.00                |        |
|                                | West        | 516 (61.9)  | 4328 (56.8)    | 1.41 [0.27 - 7.44] | 0.686  | 1.49 [0.23 - 9.63]  | 0.678  |
|                                | South       | 8 ( 1.0)    | 425 ( 5.6)     | 0.25 [0.04 - 1.37] | 0.109  | 0.26 [0.02 - 3.97]  | 0.335  |

Bi- and multivariate analyses of risk factors for developing a clinical malaria episode, including bed net use.
